# Supplementary material for: Enhanced electrochemical sensing of methyl parathion using AgNPs@IL/GO nanocomposites in aqueous matrices
Source: Royal Society of Chemistry journal article supplement (doi:10.1039/d4na00919c), 2025-01-01
Supplement: d4na00919c1.pdf [file d4na00919c1.pdf]

## Supplementary Information

### Enhanced electrochemical sensing of methyl parathion using AgNPs@IL/GO nanocomposites in aqueous matrices

Saddam Weheabby <sup>a\*</sup>, Ziyuan Liu <sup>a</sup>, Igor A. Pašti <sup>b</sup>, Vladimir Rajić <sup>c</sup>, Marcio Vidotti <sup>d</sup>, Olfa Kanoun <sup>a</sup>

<sup>a</sup> Chemnitz University of Technology, Measurement and Sensor Technology, 09126 Chemnitz, Germany

<sup>b</sup> University of Belgrade – Faculty of Physical Chemistry, Studentski trg 12-16, 11158 Belgrade, Serbia

<sup>c</sup> University of Belgrade, VINČA Institute of Nuclear Sciences - National Institute of the Republic of Serbia, Mike Petrovica Alasa 12-14, 11000 Belgrade, Serbia

<sup>d</sup> Grupo de Pesquisa em Macromoléculas e Interfaces, Universidade Federal do Paraná (UFPR), CxP 19032 - Curitiba 81531-980, PR, Brazil

\*Corresponding author: [saddam.weheabby@etit.tu-chemnitz.de](mailto:saddam.weheabby@etit.tu-chemnitz.de)

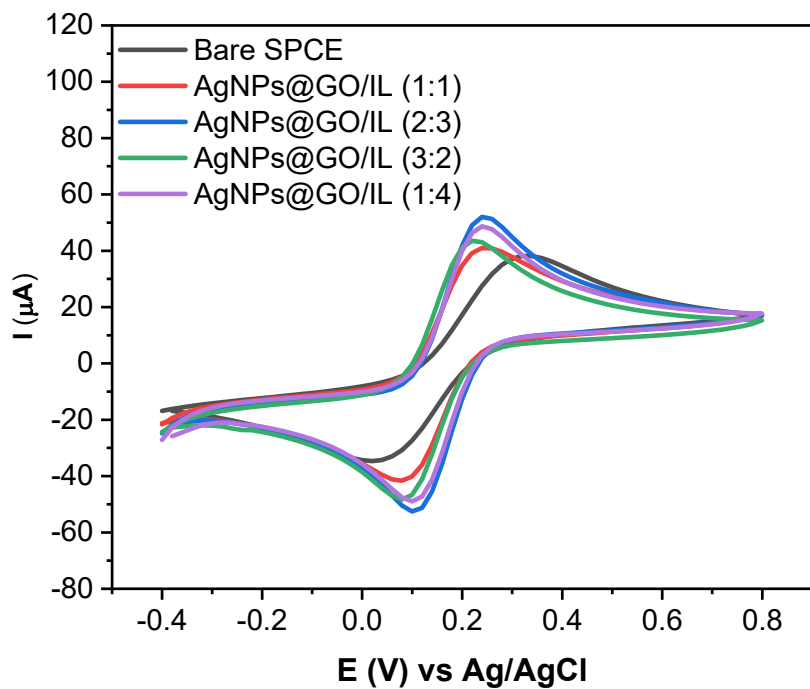

**Figure S1.** Optimization AgNP@GO/IL composite ratio in presence of  $5.0 \text{ mmol L}^{-1} [\text{Fe}(\text{CN})_6]^{3-/4-}$  in  $0.1 \text{ M KCl}$ ; scan rate  $25 \text{ mV}$ .

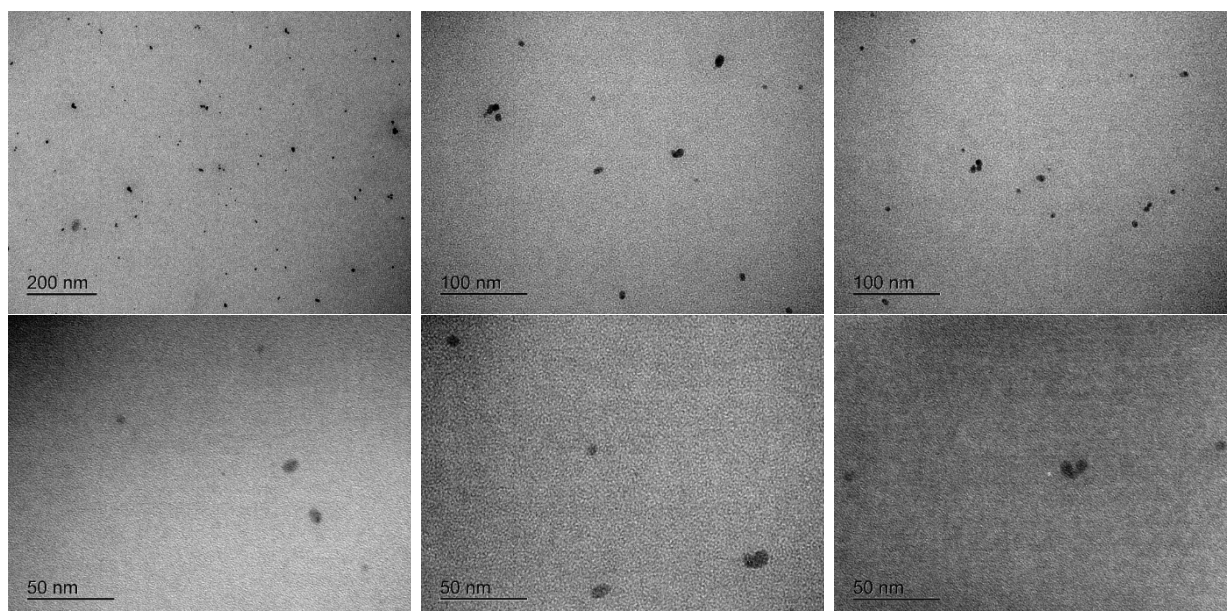

**Figure S2.** Representative TEM images of AgNPs obtained from different synthesis and different regions of the grid.

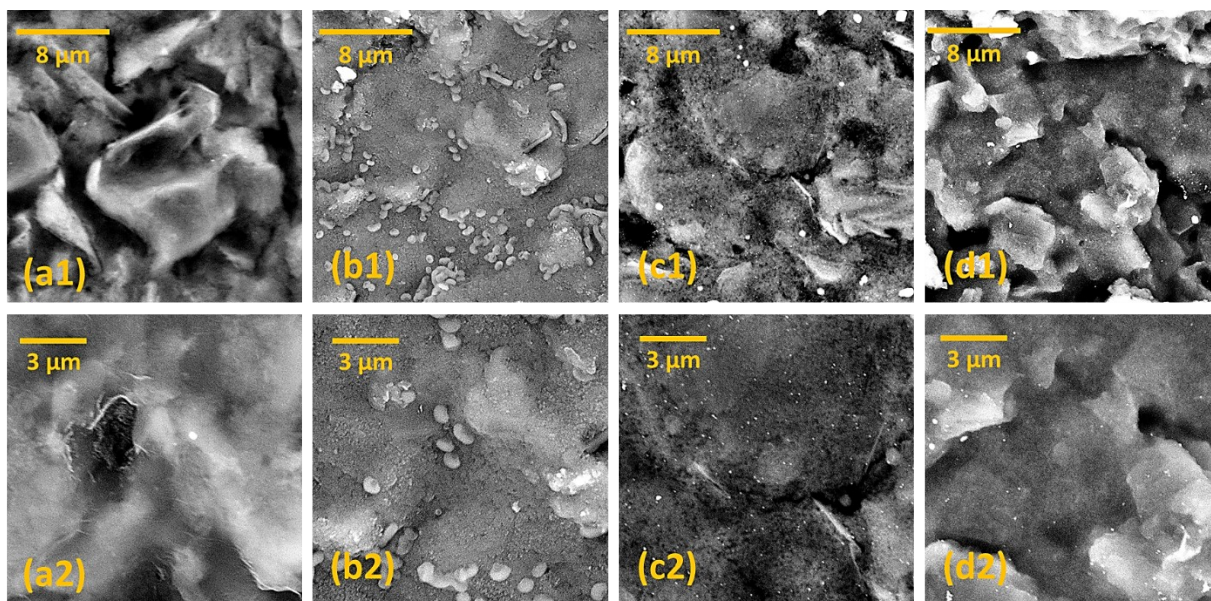

**Figure S3.** SEM images at magnifications  $\times 10,000$  (marked 1) and  $\times 20,000$  (marked 2), of the (a) GO@SPCE, (b) GO/IL@SPCE, (c) AgNPs@SPCE, and (d) AgNPs@GO/IL@SPCE. GO@SPCE and GO/IL@SPCE are covered with a Cu layer using a plasma coating procedure.

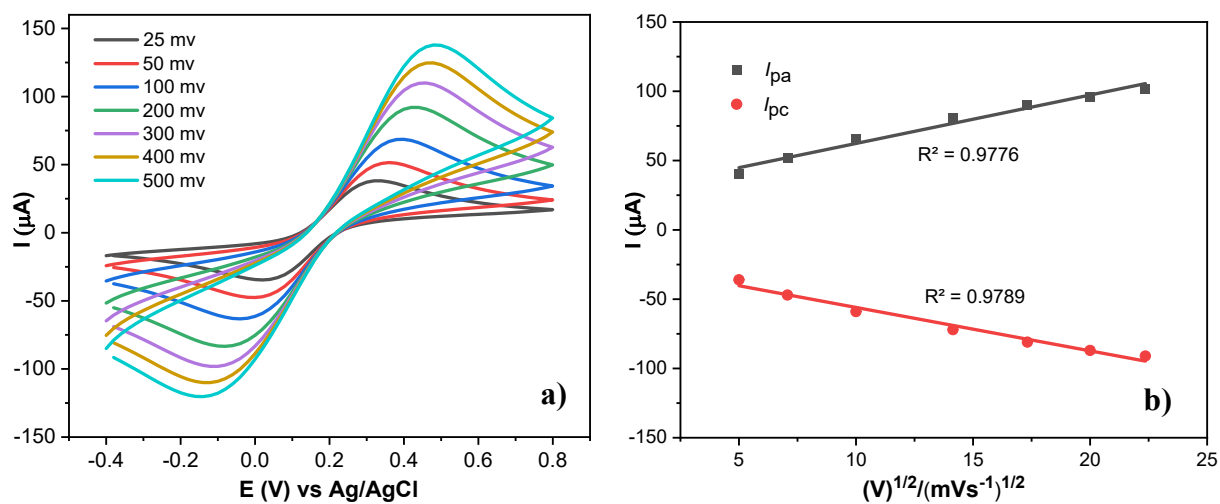

**Figure S4.** a) Cyclic voltammograms of  $5.0 \text{ mmol L}^{-1} [\text{Fe}(\text{CN})_6]^{3-/4-}$  in  $0.1 \text{ M KCl}$  obtained with a bare SPCE at different scan rates. b) Anodic current and cathodic current vs. sq. root of scan rates.

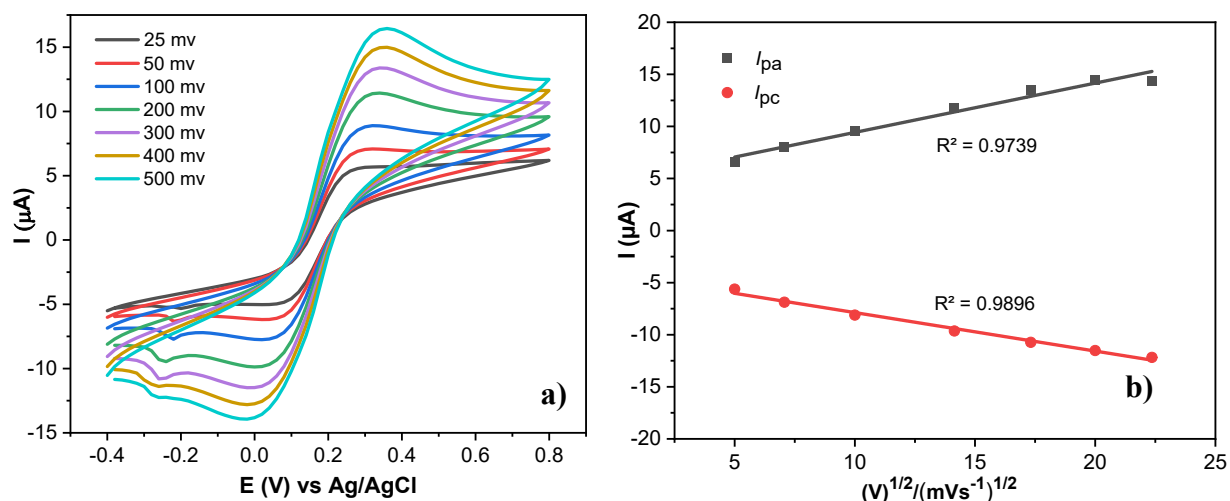

**Figure S5.** a) Cyclic voltammograms of  $5.0 \text{ mmol L}^{-1} [\text{Fe}(\text{CN})_6]^{3-/4-}$  in  $0.1 \text{ M KCl}$  obtained with  $\text{GO@SPCE}$  at different scan rates. b) Anodic current and cathodic current vs. sq. root of scan rates.

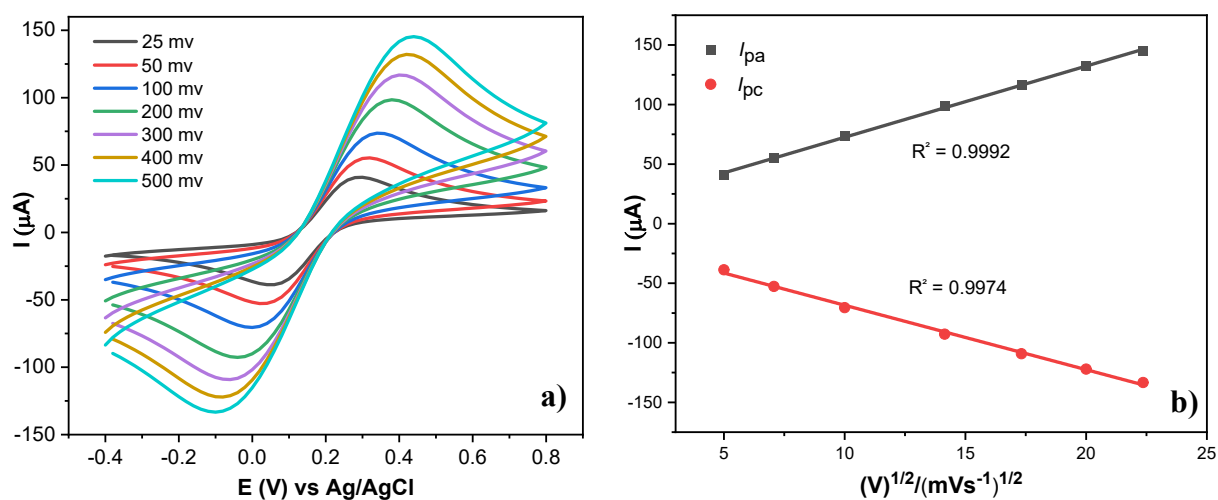

**Figure S6.** a) Cyclic voltammograms of  $5.0 \text{ mmol L}^{-1} [\text{Fe}(\text{CN})_6]^{3-/4-}$  in  $0.1 \text{ M KCl}$  obtained with  $\text{AgNPs@SPCE}$  at different scan rate. b) Anodic current and cathodic current vs. sq. root of scan rates.

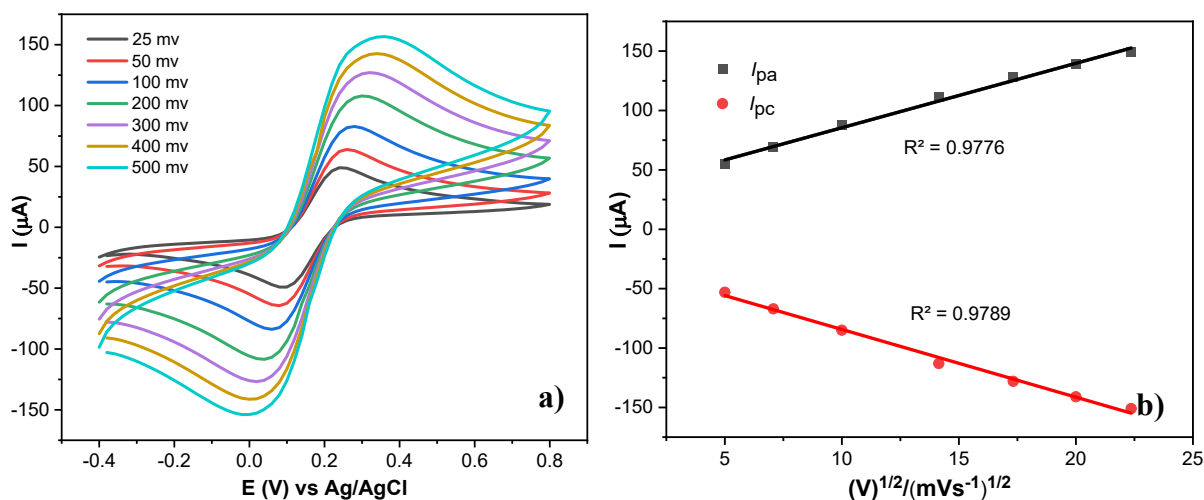

**Figure S7.** a) Cyclic voltammograms of  $5.0 \text{ mmol L}^{-1} [\text{Fe}(\text{CN})_6]^{3-/4-}$  in  $0.1 \text{ M KCl}$  obtained with  $\text{GO/IL@SPCE}$  at different scan rate. b) Anodic current and cathodic current vs. sq. root of scan rates

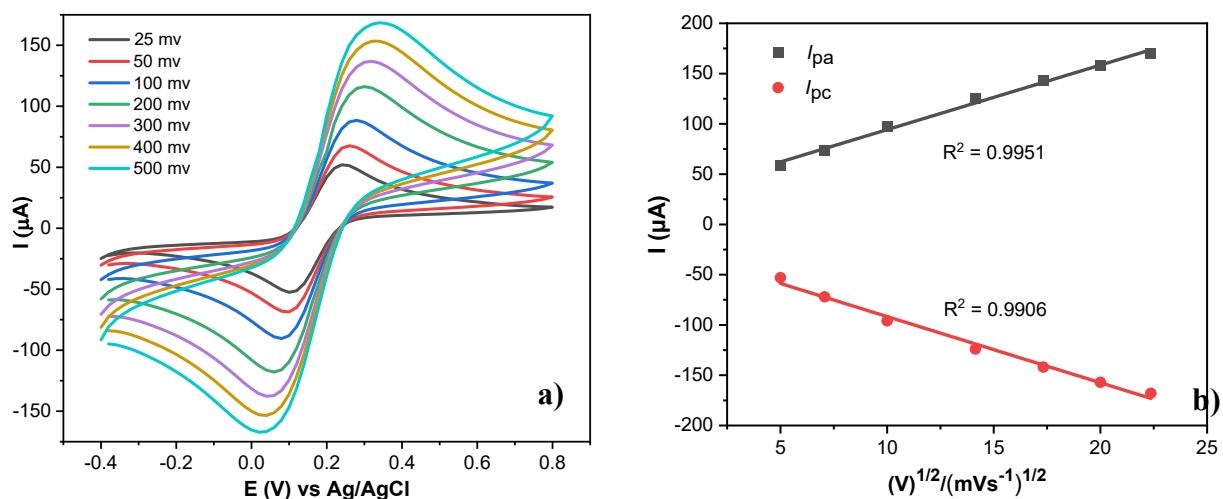

**Figure S8.** a) Cyclic voltammograms of  $5.0 \text{ mmol L}^{-1} [\text{Fe}(\text{CN})_6]^{3-/4-}$  in  $0.1 \text{ M KCl}$  obtained with  $\text{AgNPs@GO/IL@SPCE}$  at different scan rate. b) Anodic current and cathodic current vs. sq. root of scan rates.

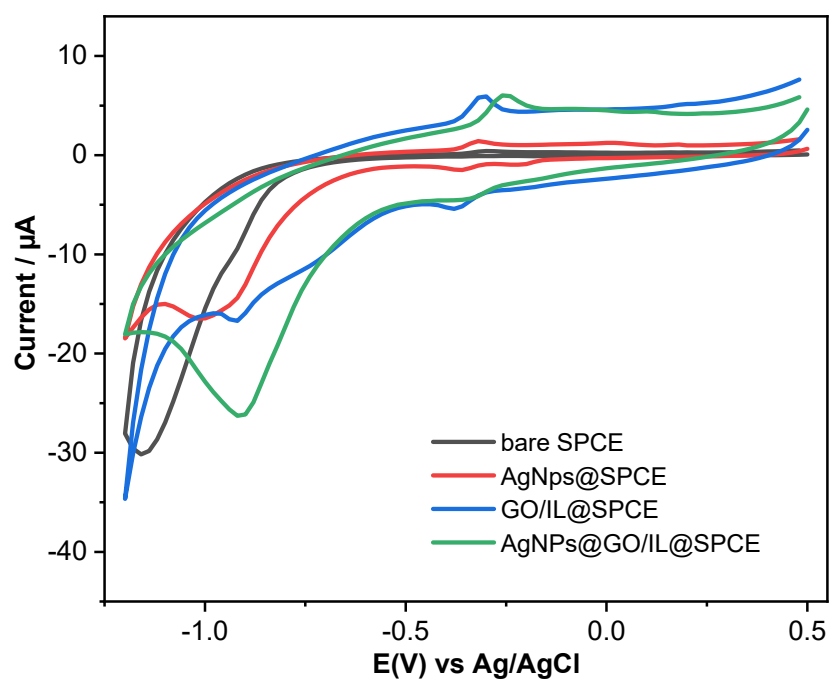

**Figure S9.** Electrochemical behavior of MP at different eletodes ( $20 \mu\text{mol L}^{-1}$  MP; in  $0.1 \text{ M PBS pH 7}$ ; Scan rate  $100 \text{ mV}^{-1}$ )

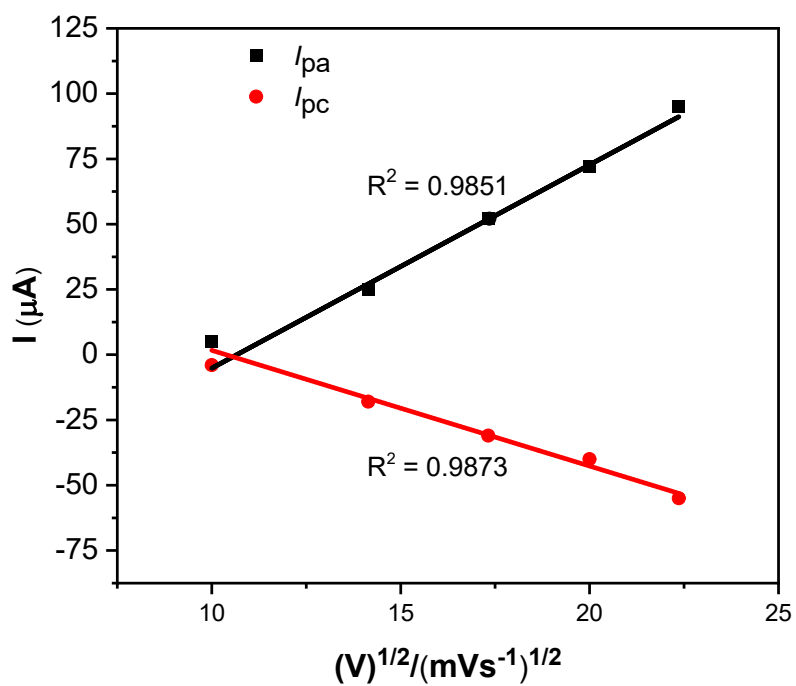

**Figure S10.** Anodic current and cathodic current vs. sq. root of scan rates of MP at AgNPs@GO/IL@SPCE (E5) electrode ( $Ox_1$  and  $R_2$  processes).

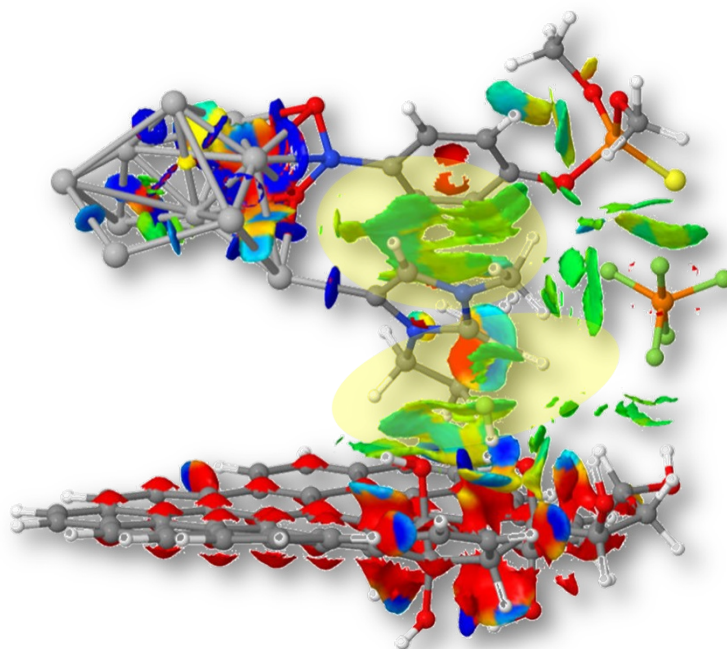

**Figure S11.** Non-covalent interaction domains in the (MP + Ag@GO/IL) system.
